# Supplementary material for: The shortcomings of accurate rate estimations in cultivation processes and a solution for precise and robust process modeling
Source: PubMed Central journal article supplement (PMC6960212; doi:10.1007/s00449-019-02214-6), 2019-09-20
Supplement: 449_2019_2214_MOESM1_ESM.pdf [file 449_2019_2214_MOESM1_ESM.pdf]

**Article title:** The shortcomings of accurate rate estimations in cultivation processes and a solution for precise and robust process modeling

**Journal name:** Bioprocess and Biosystems Engineering

**Author names:** *Bayer B.<sup>1\*</sup>, Sissolak B.<sup>2\*</sup>, Duerkop M.<sup>1</sup>, von Stosch M.<sup>3</sup>, Striedner G.<sup>1</sup>*

Affiliations:

<sup>1</sup> Department of Biotechnology, University of Natural Resources and Life Sciences  
Vienna, Austria

<sup>2</sup> Bilfinger Industrietechnik Salzburg GmbH  
Salzburg, Austria

<sup>3</sup> School of Chemical Engineering and Advanced Materials, Newcastle University,  
Newcastle upon Tyne, United Kingdom

\* These authors contributed equally.

Corresponding authors:

[benjamin.bayer@boku.ac.at](mailto:benjamin.bayer@boku.ac.at), +43 1 47654-79169

[bernhard.sissolak@boku.ac.at](mailto:bernhard.sissolak@boku.ac.at), +43 1 47654-79171

## Online Resources

### Bioprocess Simulation

We simulated the fed-batch phase of an *E. coli* fermentation for two different process setups using MATLAB (2016b, MathWorks, Massachusetts, USA). Each simulation started with the indicated parameter values as stated in Table 1. 100 individual fed-batches for each setting were simulated. These processes were simulated with varying sampling intervals of 0.5, 1, 2 and 4 h, respectively and a negligibly small sampling volume. Also, the biomass  $X$  was calculated as stated in Eq. 1 via the growth rate  $\mu$  and time  $t$ .

$$X(t) = X(t_0) e^{\mu(t-t_0)} \quad (1)$$

Further, the exponential feeding strategy was established as indicated in Eq. 2.

$$uf = \frac{1}{S_f} X(t_0) Y_{xs} \mu e^{\mu(t-t_0)} \quad (2)$$

With the feed flow rate  $uf$ , the feed glucose concentration  $S_f$ , the total biomass at the feed start  $X(t_0)$ , the biomass per glucose yield  $Y_{xs}$  and the set growth rate  $\mu$ .

**Table 1.** Cultivation settings for the simulated fed-batch processes.

| Parameter                      | Value                |
|--------------------------------|----------------------|
| starting biomass concentration | 4.4 g/L              |
| vessel volume                  | 5 L                  |
| feeding strategy               | exponential          |
| growth rate                    | 0.15 h <sup>-1</sup> |
| feed duration                  | 18 h                 |
| feed glucose concentration     | 100 g/L              |
| inhibitor concentration        | 80 g/L               |
| yield biomass/glucose          | 0.33 g/g             |
| sampling interval              | 0.5, 1, 2, 4 h       |

### Monod model

The first *in-silico* process setup was based on a glucose limitation and therefore the apparent growth rate was adjusted by the feeding rate only, following the order of Monod (Eq. 3) as shown in Figure 1A.

$$\mu = \frac{\mu_{\max} S}{K_S + S} \quad (3)$$

With the specific growth rate  $\mu$ , the assumed maximum growth rate  $\mu_{\max}$  of  $0.9 \text{ h}^{-1}$ , the limiting glucose/substrate concentration  $S$ , and the substrates affinity constant  $K_S$  with an assumed value of  $0.007$  (Senn, Lendenmann, Snozzi, Hamer, & Egli, 1994).

#### Non-competitive model

For the second process setup the exponential addition of an inhibitor, mimicking the product formation, was taken into account (Eq. 4). The inhibitor concentration was selected in a way that adequately mimics a decreased growth rate as presented in Figure 1B. Hence, the simulation was performed in such a way that the inhibitor was included in the feed.

$$\mu = \frac{\mu_{\max} S}{K_S + S} \cdot \frac{1}{1 + \frac{I}{K_i}} \quad (4)$$

Using the non-competitive model the Monod equation with the same assumed values is extended with an additional term to describe the growth inhibition, containing the inhibitor concentration  $I$  and its affinity constant  $K_i$  with an assumed value of  $1.7$ .
